# Supplementary material for: Lipidomics reveals biomarkers of the efficacy of first-line ICIs therapy combined with chemotherapy in NSCLC
Source: Research Square preprint supplement (doi:10.21203/rs.3.rs-5662148/v1), 2024-12-26
Supplement: Supplementary file 1 [file 0d559cb6937da364307a0682.docx]

**Lipidomics reveals biomarkers of the efficacy of first-line chemotherapy combined with ICI therapy in NSCLC**

Jia Yu1#, Hanyan Xu1#, Fen Xiong2, Ling fei Meng2, Hongchang Gao2*,Yuping Li1*1

Department of Respiratory and Critical Care Medicine, The First Affiliated Hospital of Wenzhou Medical University, Wenzhou 325035, China.

2Oujiang Laboratory; Institute of Metabonomics & Medical NMR, School of Pharmaceutical Sciences, Wenzhou Medical University, Wenzhou 325035, China.

**Correspondence:**

1Yuping Li. PhD. Department of Respiratory and Critical Care Medicine, The First Affiliated Hospital of Wenzhou Medical University, Wenzhou 325035, China. Tel: +86 577 55579278. E-mail: wzliyp@163.com

2Hongchang Gao. PhD. Oujiang Laboratory; Institute of Metabonomics & Medical NMR, School of Pharmaceutical Sciences, Wenzhou Medical University, Wenzhou 325035, China. Tel: +86 577 86699715. E-mail: gaohc27@wmu.edu.cn

# Supplementary methods

**1.1Nontargeted Lipidomic Acquisition**

Plasma samples were analyzed via a SHIMAZUCBM-30A Lite LC system (Shimadzu Corporation, Kyoto, Japan) in combination with a SCIEX Triple TOF 6600 system (AB SCIEX, Foster City, CA, USA). Lipid metabolites were separated on a Phenomenex Kinetex 2.6-μm C18 100A column (2.1 × 100 mm). All the samples were subjected to lipid metabolic profiling via electrospray ionization in full-scan mode with electrospray ionization (ESI)+ and ESI-. QC samples were collected at the beginning of the injection, after every 10 samples, and at the end of the run and were used to monitor the degree of stability of the instrument during the acquisition process. The method was optimized and improved according to the actual conditions of our samples.

**1.2Untargeted UHPLC-MS/MS analysis**

The raw untargeted lipidomic data were converted into mzXML format via Markerview software and analyzed via XC-MS software (California, USA). The main parameters were as follows: peak extraction time of 0.5–15 min, retention time (RT) with a deviation of 0.1 min, and mass‒charge ratio (m/z) with a deviation of 10 ppm. Next, we derived the mass‒charge ratio, retention time, and peak intensity from the raw data. To standardize the lipid profile, we normalized it via the total peak intensity normalization method. We retained peaks occurring in 80% of the samples and excluded peaks with intensities less than 500. Peaks with a relative standard deviation (RSD) <30% were considered to have high stability. To identify lipid peaks, the raw data were converted to the desired format via MSConverter software and then imported into MS-DIAL v5.1 software. Lipids were identified via the m/z values of the parent ions and the matching of the MS/MS fragments with the LipidBlast database in MS-DIAL v5.1 software. The identified lipids were further compared via HMDB v4.0. The p values were corrected via the Benjamini‒Hochberg method to control the false discovery rate (FDR). The lipid peaks were analyzed via an unpaired Student’s t test on the omicShare website (https://www.omicshare.com/tools/), and lipids with an FDR<0.05 were considered significant. Volcano maps were generated via an online tool (https://www.omicstudio.cn/tool). Heatmaps were created from Euclidean distance measurements and the ward clustering algorithm in MetaboAnalyst 5.0 software.

The mobile phases with the following conditions: (A) water: acetonitrile: carbinol (3:1:1 v/v/v) with 5 mM ammonium acetate and B: isopropanol at a flow rate of 0.3 mL/min. The analysis was conducted using gradient elution following the methods described previously: 0–0.5 min, 25% B; 0.5–1.5 min, 25–40% B; 1.5– 3 min, 40–60% B; 3–13 min, 60–98% B; 13–13.1 min, 98–25% B; 13.1–18 min, 25–25% B. The column temperature was controlled at 40℃. The volume of sample introduced into the injector was 2 ul. The collision energy used for the fragmentation was 40 V.

**1.3 Semitargeted lipid histology analysis**

Semitargeted lipidomics differs from targeted lipid histology in that similar lipid compounds are selected from the same family rather than specific standards for each lipid analyzed. Standard curves generated from standards belonging to the same lipid class were used to quantify the concentrations of the corresponding compounds. One milligram of various lipid controls, such as 1,2-dipalmitoyl-sn-glycero-3-phosphocholine (PC-32:0) (GlpBio, USA), 2-octadecyl-sn-glycero-3-phosphocholine (LPC-18:0) (USA), 1,2-dipalmitoyl-sn-glycero-3-phospho-(1′-inositol) (PI-32. 0) (Sigma, USA), 1-stearoyl-2-hydroxy-sn-glycero-3-phosphatidylinositol (ammonium salt) (LPI-18:0) (Sigma, USA), 1,2-dipalmitoyl-sn-glycero-3-phosphatidyl-L-serine (PS-16:0) (GlpBio, USA), 1,2-dicosanoyl-sn-glycero-3- phosphoethanolamine (PE-16:0) (Sigma, USA), 5-PAHSA (GlpBio, USA), stearic acid (FA-18:0) (Sigma, USA), linoleic acid (FA-18:2) (Sigma, USA), and docosahexaenoic acid (FA-20:4) (Sigma, USA) was used. The original control solution was prepared by adding 50% acetonitrile to obtain a concentration of approximately 1 mg/mL. The mixture was diluted with acetonitrile solution to obtain a mixed control solution with a concentration of 100 μg/mL of the control mixture; the appropriate amount of all the control solutions was pipetted, mixed well, and then mixed step by step with acetonitrile solution to form the control solution with concentrations of 1, 2.5, 5, 10, 25, 50, 100, 250, and 500 ng/mL, as well as 1, 2.5, and 5 μg/mL. Working solution concentrations of lipid metabolites were detected via MRM in ESI+ and ESI- modes via semitargeted lipidomics on an API6500 Q-TRAP mass spectrometer (AB SCIEX, Foster City, CA, USA). Standard curves for each lipid class can be obtained on the basis of the peak area of each lipid standard. The concentration of each lipid metabolite can be obtained from the peak area of each lipid metabolite via the standard curve of each lipid standard. Sample handling and instrumental conditions were the same as those for the off-target analysis. Lipid levels were calculated via AB Sciex MultiQuant™ software (version 2.1, AB SCIEX, CA, USA).

The mobile phase conditions were as follows: (A) H2O: MeOH: ACN (3: 1: 1, V: V: V) with 5 mM ammonium acetate, (B) IPA at a flow rate of 0.3 mL/min. The gradient elution analysis was as follows: 0 - 0.5 min, 25% B; 0.5 - 1.5 min, 25 - 40% B; 1.5 - 3 min, 40 - 60% B; 3 - 13 min, 60 - 98% B; 13 - 13.1 min, 98 - 25% B; 13.1 - 18 min, 25 - 25% B. The injection volume and column temperature were kept the same as mentioned above.

# Supplementary Figures and Tables

| **Table S1: Plasma Differential Metabolites in the PFS<12 months and PFS≥12 months Groups** | | | | | |
| --- | --- | --- | --- | --- | --- |
| **Name** | **Adduct** | **Formula** | **m/z** | **RT** | **P Value** |
| FA-15:0 | M+K-2H | C15H30O2 | 277.2178 | 8.36 | 0.0000191 |
| FA-16:0 | M-H | C16H32O2 | 255.2325 | 9.37 | 0.000146454 |
| FA-16:1 | M-H | C16H30O2 | 253.2178 | 8.66 | 0.0000475 |
| FA-18:0 | M-H | C18H36O2 | 283.2634 | 10.23 | 0.001898305 |
| FA-18:1 | M-H | C18H34O2 | 282.2501 | 9.48 | 0.000024 |
| FA-18:2 | M-H | C18H32O2 | 279.2331 | 9.01 | 0.0000217 |
| FA-20:1 | M-H | C20H38O2 | 309.2797 | 10.42 | 0.002066914 |
| FA-20:3 | M-H | C20H34O2 | 305.226 | 7.64 | 0.0000987 |
| FA-20:4 | M-H | C20H32O2 | 303.2312 | 8.9 | 0.0000283 |
| FA-22:4 | M-H | C22H36O2 | 331.2638 | 9.55 | 0.000127734 |
| FA-22:5 | M-H | C22H34O2 | 329.247 | 9.05 | 0.000178361 |
| FA-22:6 | M-H | C22H32O2 | 327.233 | 8.67 | 0.000125178 |
| FAHFA-21:3 | M-H | C21H34O4 | 349.2387 | 9.55 | 0.00000689 |
| FAHFA-22:2 | M-H | C22H38O4 | 365.267 | 7.87 | 0.000577112 |
| FAHFA-14:2 | M-H | C19H32O4 | 323.2175 | 9.35 | 0.00000615 |
| FAHFA-24:2 | M-H | C24H42O4 | 393.2975 | 8.62 | 0.00000057 |
| FAHFA-26:1 | M-H | C26H48O4 | 423.3465 | 9.59 | 0.00000571 |
| FAHFA-27:4 | M-H | C27H44O4 | 431.3128 | 8.74 | 0.00000334 |
| FAHFA-28:0 | M-H | C26H50O4 | 425.3608 | 9.99 | 0.000230138 |
| FAHFA-28:4 | M-H | C28H46O4 | 445.3316 | 9.32 | 0.0000222 |
| FAHFA-28:5 | M-H | C28H44O4 | 443.312 | 8.86 | 0.00000343 |
| FAHFA-30:0 | M-H | C30H58O4 | 481.0932 | 0.65 | 0.001691542 |
| FAHFA-32:0 | M-H | C32H62O4 | 509.3417 | 8.97 | 0.000000481 |
| FAHFA-32:2 | M-H | C32H58O4 | 505.4229 | 11.01 | 0.000133047 |
| FAHFA-32:3 | M-H | C32H56O4 | 503.405 | 10.39 | 0.00000648 |
| FAHFA-32:4 | M-H | C32H54O4 | 501.3915 | 10.25 | 0.00000358 |
| FAHFA-32:5 | M-H | C32H52O4 | 499.3749 | 9.97 | 0.00000152 |
| FAHFA-34:2 | M-H | C34H62O4 | 534.2518 | 5.1 | 4.03E-08 |
| FAHFA-35:5 | M-H | C35H58O4 | 540.4334 | 9.59 | 0.0000899 |
| FAHFA-37:5 | M-H | C37H62O4 | 569.2222 | 5.02 | 0.0000066 |
| FAHFA-38:4 | M-H | C38H66O4 | 585.4912 | 9.64 | 0.0000434 |
| LPC-14:0 | M+Hac-H | C22H46NO7P | 526.3102 | 7.03 | 4.26E-08 |
| LPC-16:0 | M+FA-H | C24H50NO7P | 540.3315 | 7.51 | 0.000000212 |
| LPC-16:1 | M+FA-H | C24H48NO7P | 538.3152 | 6.82 | 0.000000147 |
| LPC-18:0 | M+Hac-H | C26H54NO7P | 581.3182 | 7.25 | 0.000000157 |
| LPC-18:1 | M+FA-H | C26H52NO7P | 566.3438 | 7.76 | 0.000000523 |
| LPC-20:2 | M+Hac-H | C28H54NO7P | 605.155 | 0.61 | 0.001860008 |
| LPE-18:1 | M-H | C23H46NO7P | 478.2923 | 7.22 | 0.000004 |
| LPE-20:3 | M+TFA-H | C25H46NO7P | 617.4738 | 10.7 | 0.0000948 |
| LPE-22:6 | M-H | C27H44NO7P | 524.2758 | 6.84 | 0.0000121 |
| LPI-18:0 | M-C6H10O4+H | C27H51O12P | 452.2758 | 7.15 | 0.00000147 |
| LPI-18:1 | M-C6H10O5-H | C27H51O12P | 435.3462 | 9.53 | 0.000011 |
| PA-12:0 | M-H | C15H29O8P | 367.1541 | 4.93 | 0.002905188 |
| PA-15:0 | M+NH4 + | C18H35O8P | 428.3108 | 6.38 | 0.000000354 |
| PA-36:2 | M+li | C39H73O8P | 694.2312 | 5.18 | 0.00000159 |
| PC-14:0 | M-H | C22H44NO8P | 480.3077 | 7.47 | 0.00000014 |
| PC-33:4 | M+ACN+2H | C41H74NO8P | 391.2826 | 8.33 | 0.00000295 |
| PC-34:2 | M+FA-H | C42H80NO8P | 802.5608 | 8.65 | 0.000000453 |
| PC-5:0 | M+ACN+2H | C13H26NO8P | 376.2972 | 9.97 | 0.00000169 |
| PE-O-34:2 | M+Na-2H | C39H76NO7P | 703.2625 | 5.18 | 8.09E-08 |
| PE-P-34:2 | M+ACN+2H | C39H74NO7P | 721.2536 | 5.15 | 0.0000205 |
| PE-19:1 | M+H+ | C24H46NO8P | 508.337 | 8.94 | 0.0000214 |
| PE-20:0 | M+H-H2O | C25H50NO8P | 506.3228 | 7.78 | 0.000000178 |
| PG-36:3 | M-C6H8O6+H | C42H77O10P | 597.5019 | 10.72 | 0.000728769 |
| PI-40:4 | M+C2H3N+Na-2H | C49H87O13P | 977.7599 | 14.83 | 0.00000224 |
| PS-36:3 | M+NH4 + | C42H76NO10P | 803.5611 | 8.75 | 0.000000208 |
